# Supplementary material for: Functional Characterization of the alb1 Orthologue Gene in the Ochratoxigenic Fungus Aspergillus carbonarius (AC49 strain)
Source: Toxins (Basel). 2018 Mar 12;10(3):120. doi: 10.3390/toxins10030120 (PMC5869408; doi:10.3390/toxins10030120)
Supplement: Supplementary file 1 [file toxins-10-00120-s001.pdf]

# Supplementary Materials: Functional characterization of the *alb1* orthologue gene in the ochratoxigenic fungus *Aspergillus carbonarius* (AC49 strain)

Donato Gerin, Luis González-Candelas, Ana-Rosa Ballester, Stefania Pollastro, Rita Milvia De Miccolis Angelini and Francesco Faretra

**Table S1.** Determination of the number of T-DNA copies integrated in the genome of *A. carbonarius* transformants.

| Strain           | Cq <sub>alb1</sub> | Cq <sub>NRPS</sub> | ΔCq <sub>target</sub> | ΔCq <sub>ref</sub> | GC*  |
|------------------|--------------------|--------------------|-----------------------|--------------------|------|
| AC49             | 23.38±0.17         | 23.29±0.01         | -                     | -                  | -    |
| Δ <i>alb1</i> -1 | 23.21±0.11         | 23.20±0.06         | 0.38                  | 0.35               | 1.08 |
| Δ <i>alb1</i> -2 | 23.44±0.02         | 23.41±0.05         | 0.33                  | 0.31               | 1.07 |
| Δ <i>alb1</i> -3 | 23.29±0.02         | 23.29±0.01         | 0.36                  | 0.33               | 1.09 |
| Δ <i>alb1</i> -4 | 23.25±0.02         | 23.40±0.07         | 0.37                  | 0.31               | 1.20 |
| Δ <i>alb1</i> -5 | 23.80±0.25         | 23.84±0.02         | 0.26                  | 0.23               | 1.11 |
| Δ <i>alb1</i> -6 | 22.56±0.02         | 22.52±0.14         | 0.58                  | 0.54               | 1.07 |

\*Gene copy number (GC) quantification was conducted by wPCR according to the formula  $GC = E_{target}^{(Cq_{control}-Cq_{sample})}/E_{ref}^{(Cq_{control}-Cq_{sample})}$ . Gene *alb1* was used as target gene for *alb1* transformants, and the *nrps* gene was used as a reference. Wild-type *A. carbonarius* AC49 strain was used as control. All reactions were conducted in duplicate.

**Table S2.** Three-way ANOVA on data of conidia and OTA production of *A. carbonarius* Δ*alb1* and WT strains.

| Source              | df* | Conidiogenesis |          | OTA production |          |
|---------------------|-----|----------------|----------|----------------|----------|
|                     |     | F              | <i>p</i> | F              | <i>p</i> |
| <i>Main effects</i> |     |                |          |                |          |
| Strain (A)          | 3   | 122.02         | 0.00     | 49.75          | 0.00     |
| Temperature (B)     | 1   | 4.50           | 0.03     | 840.68         | 0.00     |
| Medium (C)          | 2   | 3.74           | 0.03     | 724.66         | 0.00     |
| <i>Interactions</i> |     |                |          |                |          |
| A x B               | 3   | 2.86           | 0.04     | 12.4           | 0.00     |
| A x C               | 6   | 5.26           | 0.00     | 11.83          | 0.00     |
| B x C               | 2   | 5.26           | 0.01     | 365.6          | 0.00     |
| A x B x C           | 6   | 4.78           | 0.00     | 4.11           | 0.00     |

df: degree freedom; F: Fisher ratio; bold  $p \leq 0.01$

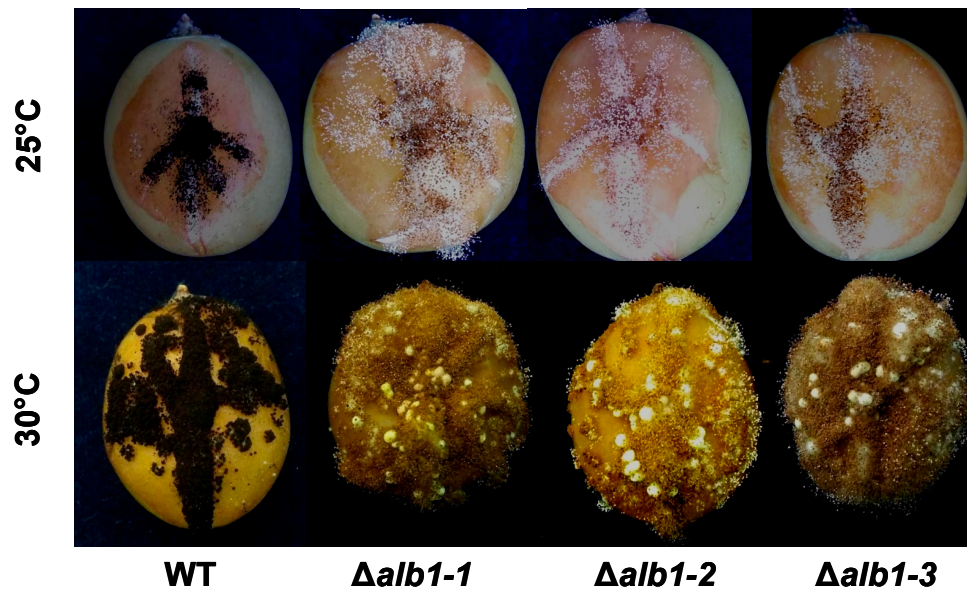

Figure S1. Grape berries at 7 days after inoculation with  $\Delta alb1$  mutants and WT.
